# Supplementary material for: Local conditions influence the reproductive strategies and pollen diet of a solitary cavity-nesting bee in a Mediterranean peri-urban environment
Source: Research Square preprint supplement (doi:10.21203/rs.3.rs-8723209/v1), 2026-01-30
Supplement: Supplementary file 1 [file 3b5de7fcfddad720093475d5.docx]

**Methods used for DNA metabarcoding and bioinformatic processing of pollen samples**

Ethanol was removed with gentle pipetting and by evaporation in a chemical hood, then the pollen pellets were grinded with a Tissue Lyser® II (Qiagen©, Hilden, Germany) anticipated by a step of freezing in liquid nitrogen. DNA from pollen was extracted with Qiagen DNeasy Plant Mini Kit (Qiagen, Hilden, Germany) following manufacturer’s protocol. The ITS2 marker, the nuclear internal transcribed spacer 2 region (primers ITS-3p62plF1 - ITS-4unR1, Kolter & Gemeinholzer, 2021), was chosen for achiving plant molecular identification. Library preparation and sequencing were conducted by a private company (IGA Technology Services S.r.l., Udine, Italy).

Initial read quality was assessed using FastQC and MultiQC to inspect sequencing performance, keeping only paired-end reads and applying strict parameters to control overlap, error rate, and ambiguous bases. Amplicon Sequence Variant (ASV) analysis was carried out with DADA2 (Callahan et al., 2016). After primer removal, low-quality reads, ambiguous bases, PhiX contamination, and reads shorter than 50 bp were removed. ASVs were inferred by denoising forward and reverse reads separately. Chimeric sequences and very rare variants were removed to reduce artifacts. ASV length distributions were examined, and the final ASV tables and representative sequences were prepared for downstream analysis. Taxonomic classification up to the species level was performed using the QIIME2 feature-classifier plugin with a naive Bayes classifier trained on the MetaCurator ITS2 reference database (Bolyen et al., 2019; Richardson et al., 2020), with a confidence threshold of 0.5. The obtained classification of the most abundant and representative ASVs was manually validated with the BLAST algorithm on the whole NCBI database (Madden, 2013) and the known regional distribution of plants (Portal to the Flora of Italy, 2025). Following this, a filtering was applied to remove the ASV with reads <1% of the total of a given sample, following the recommendations by Tommasi et al. (2021).
